# Supplementary material
Source: PubMed Central journal article supplement (PMC3795834)
Supplement: NIHMS511345-supplement-1.pdf [file NIHMS511345-supplement-1.pdf]

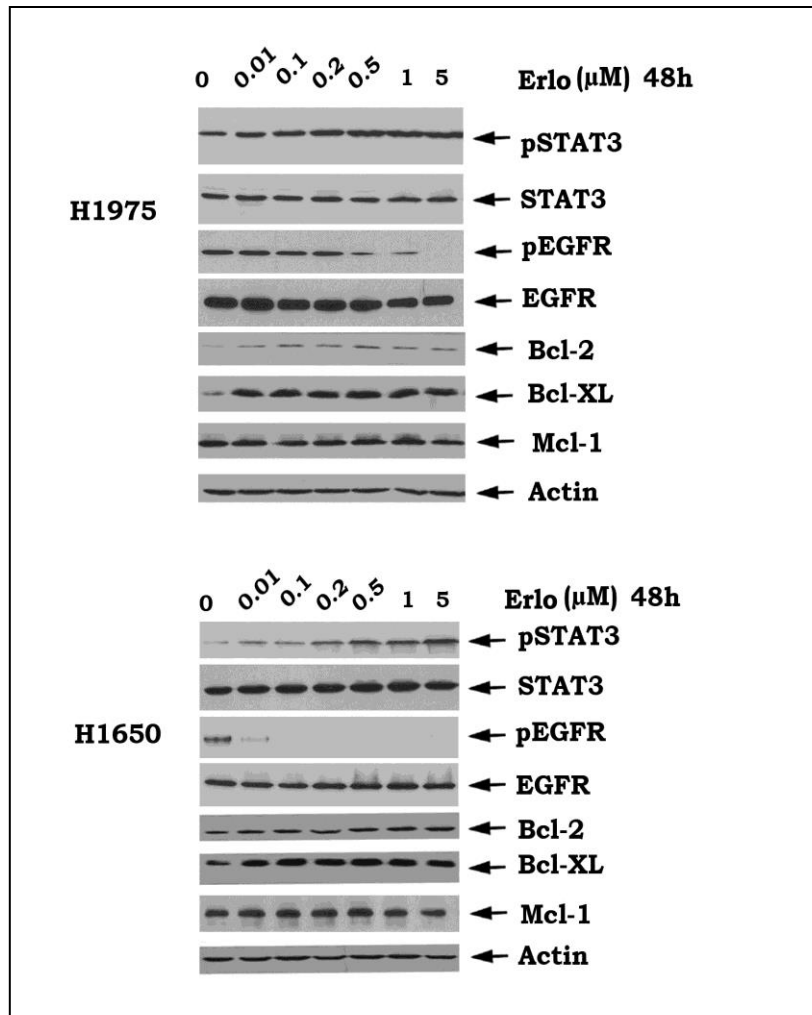

**Figure S1.** Inhibition of EGFR by erlotinib (Erlo) results in STAT3 phosphorylation at Tyr 705 and increased Bcl2/Bcl-XL in human lung cancer H1650 and H1975 cells.
