# Supplementary material
Source: PubMed Central journal article supplement (PMC3795834)
Supplement: NIHMS511345-supplement-3.pdf [file NIHMS511345-supplement-3.pdf]

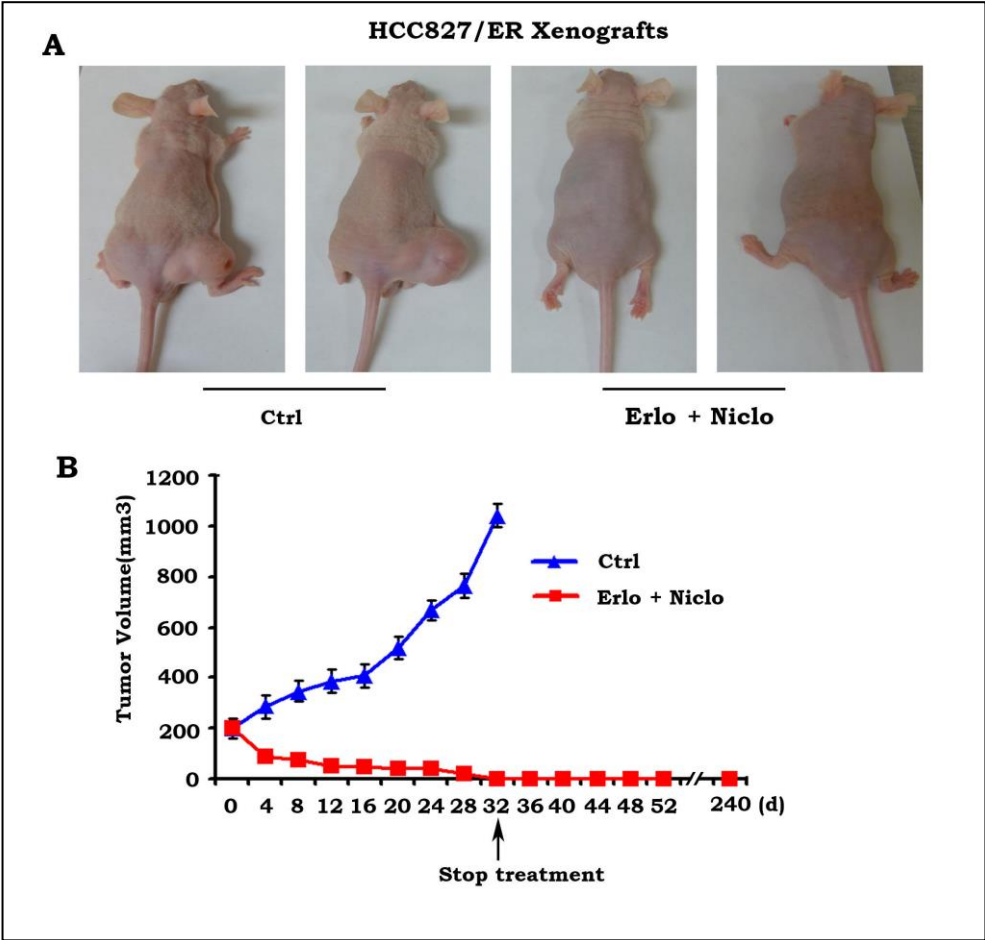

**Figure S3.** Treatment of mice with human lung cancer HCC827/ER xenografts using a combination of erlotinib (Erlo, 40mg/kg/d) and niclosamide (Niclo, 20mg/kg/d) results in a long term tumor-free survival.
