# Supplementary material
Source: PubMed Central journal article supplement (PMC3795834)
Supplement: NIHMS511345-supplement-4.pdf [file NIHMS511345-supplement-4.pdf]

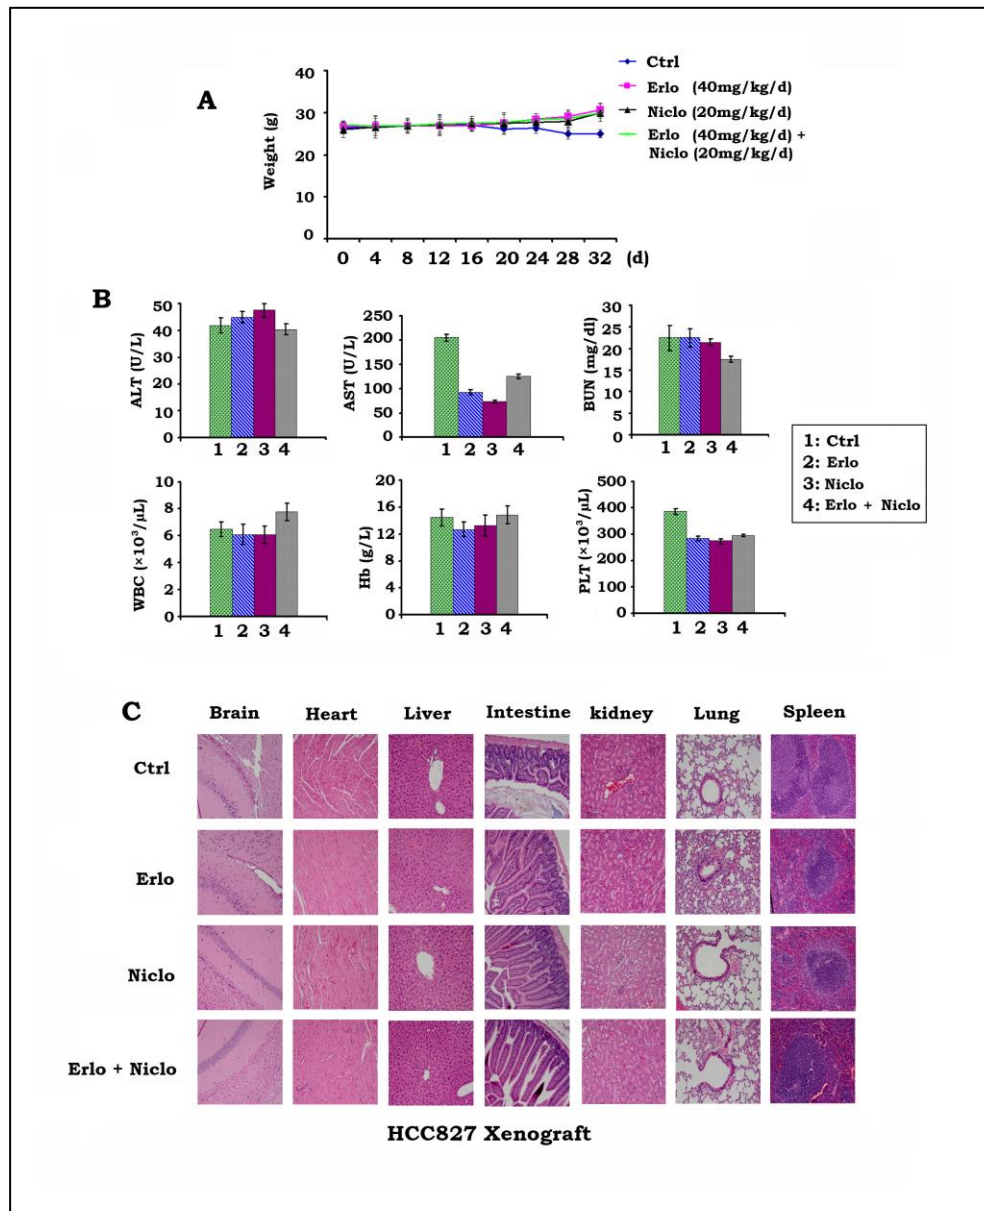

**Figure S4.** Toxicity analysis for treatments with erlotinib and niclosamide in mice bearing HCC827 xenografts. *A*, Body weight of mice with HCC827 xenografts was measured once every other day during treatment with vehicle control, erlotinib (Erlo, 40mg/kg/d), niclosamide (Niclo, 20mg/kg/d) or in combination. *B*, Blood analysis of mice after various treatments for 32 days. *C*, H&E histology of various organs after various treatments.
