# Supplementary material
Source: PubMed Central journal article supplement (PMC3795834)

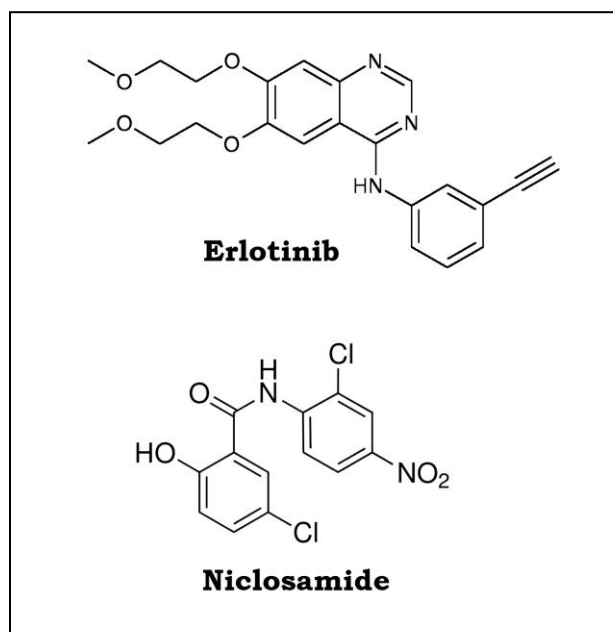

**Figure S2.** Structures of erlotinib and niclosamide.

Supplement: NIHMS511345-supplement-2.pdf [file NIHMS511345-supplement-2.pdf]
